# Supplementary material for: Three-Dimensional Genome Map of the Filamentous Fungus Penicillium oxalicum
Source: PubMed Central journal article supplement (PMC9241887; doi:10.1128/spectrum.02121-21), 2022-05-02
Supplement: spectrum.02121-21-s006.pdf [file spectrum.02121-21-s006.pdf]

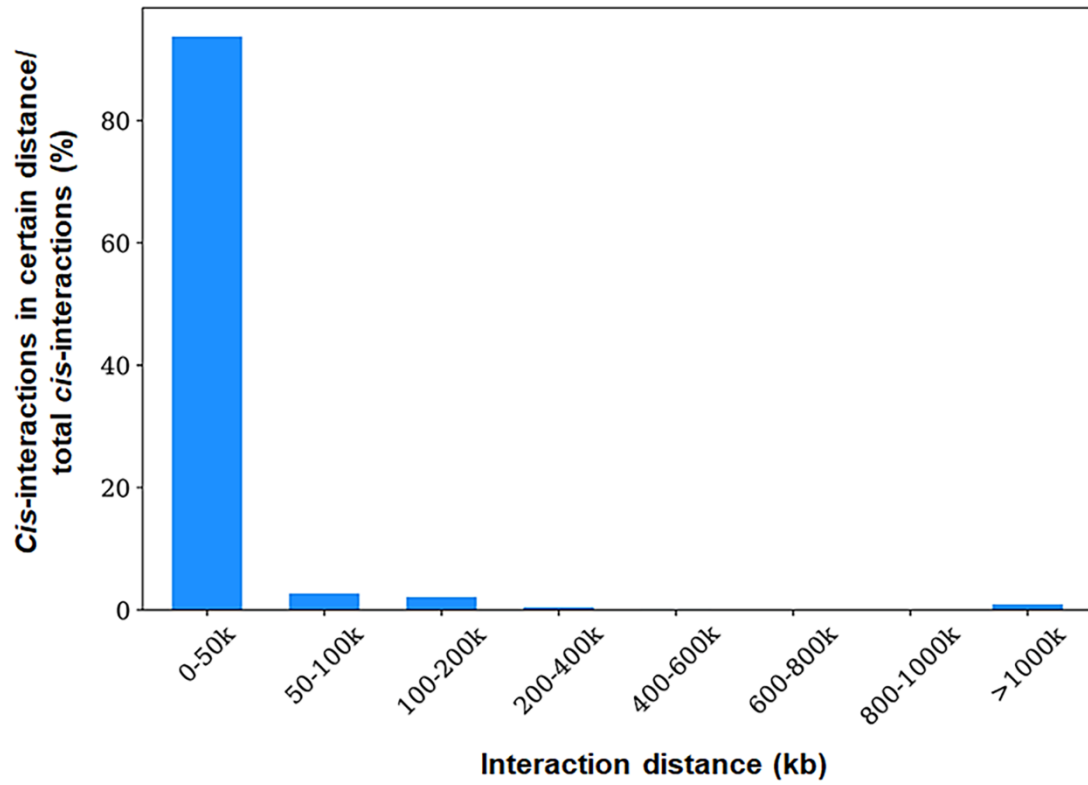

**Fig. S1 Analysis of cis-interactions in certain distances in the genome of *Penicillium oxalicum*.**
